# Supplementary material
Source: HighWire-hosted journal article supplement (https://jnm.snmjournals.org/highwire/filestream/110593/field_highwire_adjunct_files/0/263294_Supplemental_Data.pdf)
Supplement: 263294_Supplemental_Data.pdf [file 263294_Supplemental_Data.pdf]

Supplemental Figure 1

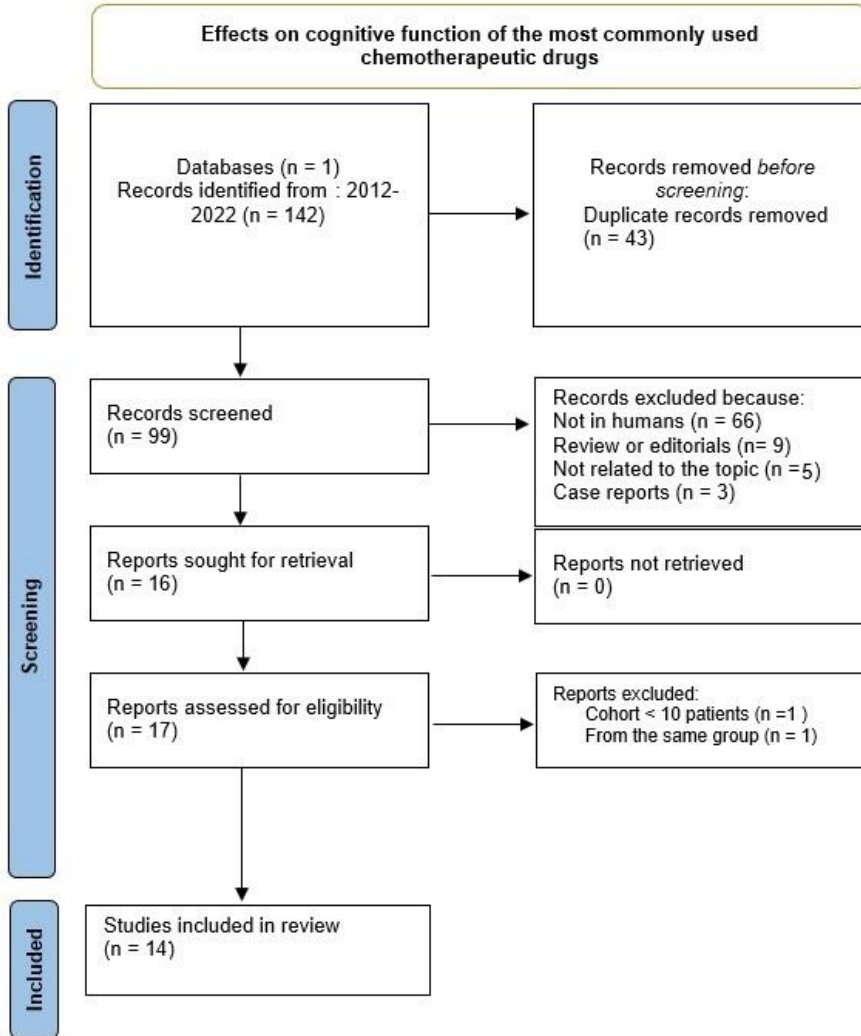

Supplemental Figure 2

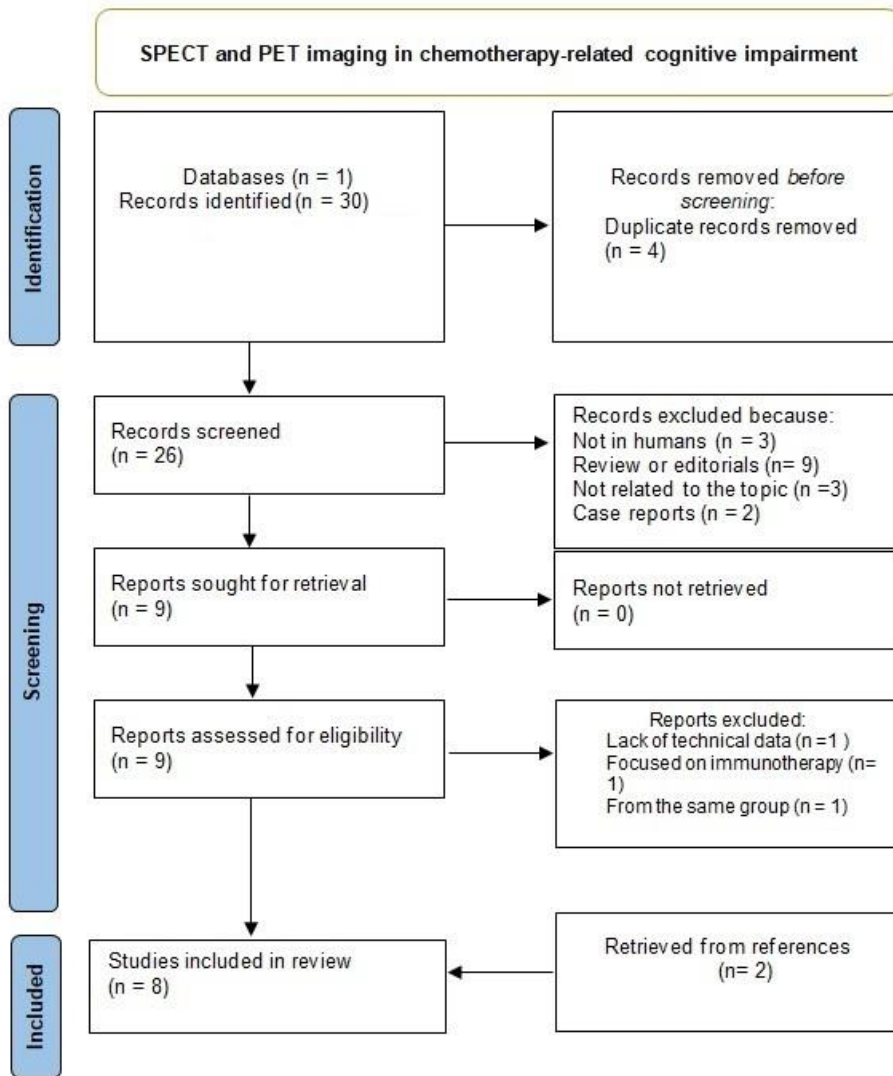

Supplemental Figure 3

### CRCI DETECTION AND FEATURES IN SELECTED PAPERS

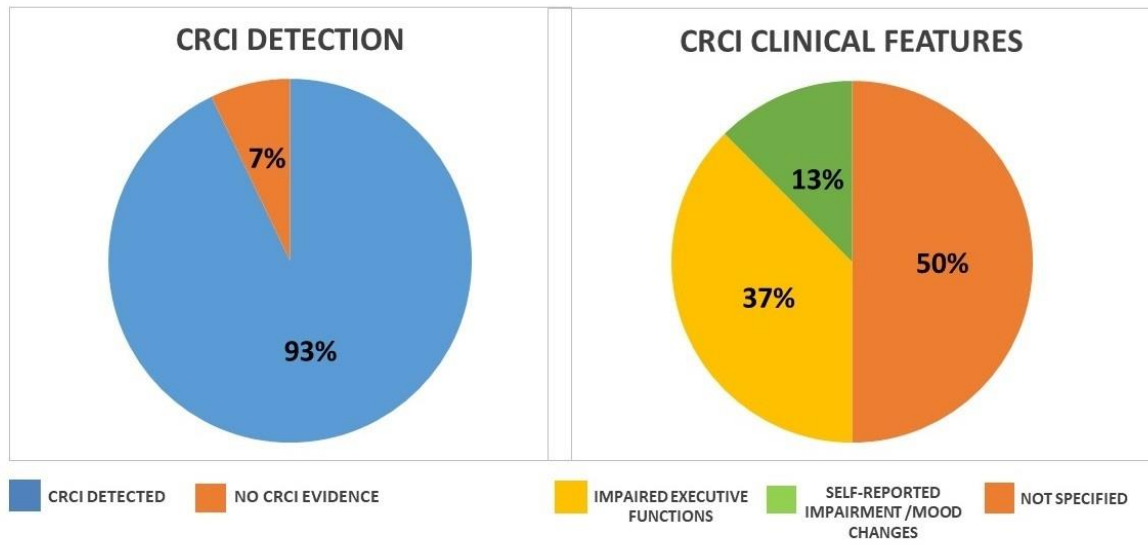

Supplemental Figure 4

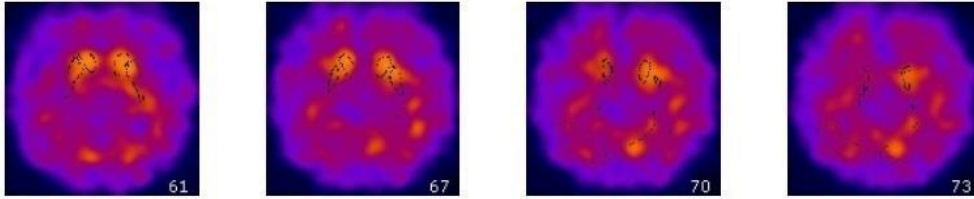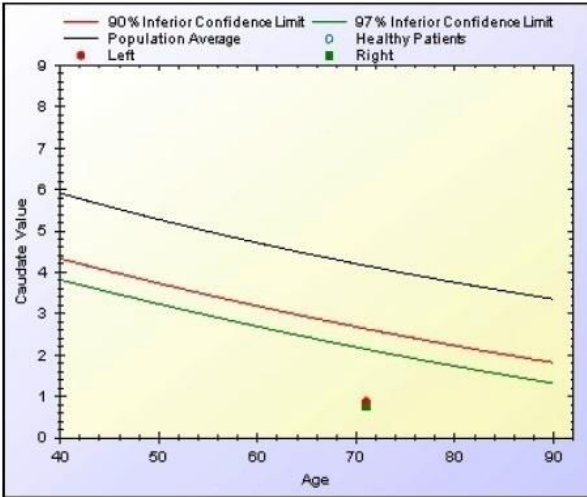

Caudate: patient activity (left side in red, right side in green)

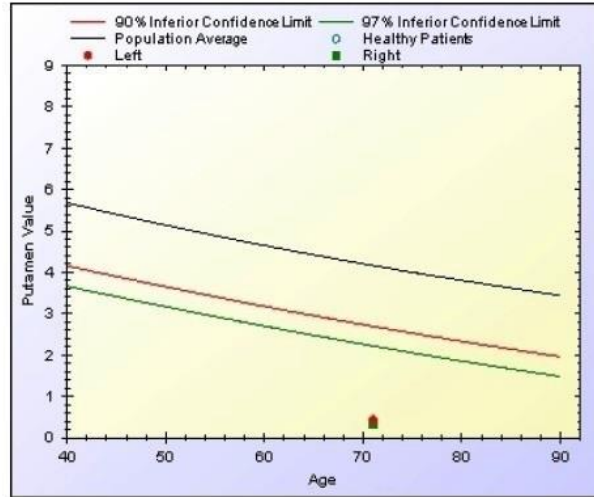

Putamen: patient activity (left side in red, right side in green)

**SUPPLEMENTAL TABLE 1.** Studies on Effects of Most Commonly Used Chemotherapeutic Drugs on Cognitive Function

| Study                      | Year | Location                | Study design                                   | Cancer type                  | Sample | Chemotherapeutic drugs                                                                               | CRCI assessment timing                                                            | Comments                                                                                                                                                                                                                                                                                           |
|----------------------------|------|-------------------------|------------------------------------------------|------------------------------|--------|------------------------------------------------------------------------------------------------------|-----------------------------------------------------------------------------------|----------------------------------------------------------------------------------------------------------------------------------------------------------------------------------------------------------------------------------------------------------------------------------------------------|
| Andreis et al. (19)        | 2013 | Italy                   | Observational                                  | Colorectal                   | 57     | Oxaliplatin, 5-fluorouracil, and leucovorin                                                          | Neuropsychologic battery at baseline, end of therapy, and 6 mo after chemotherapy | No cognitive impairment was seen, only some changes in emotional performance during chemotherapy                                                                                                                                                                                                   |
| Khan et al. (21)           | 2016 | India                   | Prospective cohort                             | Non-Hodgkin lymphoma         | 68     | CHOP vs. R-CHOP                                                                                      | Neuropsychologic assessment performed after 1st, 2nd, 3rd, and 4th cycles         | R-CHOP patients had more profound cognitive decline than patients who underwent CHOP alone                                                                                                                                                                                                         |
| Lange et al. (22)          | 2016 | France                  | Observational                                  | Breast                       | 123    | Doxorubicin ± docetaxel                                                                              | Evaluation before chemotherapy and after end of treatment                         | Chemotherapy ( $n = 58$ ) and radiotherapy ( $n = 61$ ) patients were compared with healthy controls ( $n = 61$ ) for cognitive performance: 49% of radiotherapy and chemotherapy patients had cognitive decline after adjuvant therapy, with chemotherapy group having more subjective complaints |
| Miao et al. (23)           | 2016 | China                   | Comparative                                    | Breast                       | 23     | Docetaxel, doxorubicin, cyclophosphamide                                                             | Assessment at $36.6 \pm 4.4$ mo after chemotherapy                                | Functional connectivity (i.e., executive function) of anterior cingulate cortex was significantly lower in breast cancer group than in control group                                                                                                                                               |
| Amidi et al. (18)          | 2017 | Denmark and Netherlands | Observational                                  | Testicular                   | 64     | Bleomycin, etoposide, and cisplatin                                                                  | Neuropsychologic battery at 6 mo after chemotherapy                               | Twenty-two patients received surgery plus chemotherapy, whereas 42 underwent only surgery and were on active surveillance; chemotherapy patients experienced relevant CRCI                                                                                                                         |
| Cerulla et al. (20)        | 2017 | Spain                   | Prospective, longitudinal                      | Breast                       | 51     | Fluorouracil, epirubicin, and cyclophosphamide with vs. without taxanes                              | Assessment at baseline, short-term and long-term                                  | Short-term assessment showed cognitive decline (i.e., executive function) in both groups, with greater number of affected cognitive measures in taxane-group; long-term assessment confirmed cognitive impairment in both groups                                                                   |
| Ehrhardt et al. (24)       | 2018 | United States           | Retrospective cohort                           | Non-Hodgkin lymphoma         | 187    | Methotrexate, cytarabine, anthracyclines                                                             | Evaluation in long-term (>10 y) survivors                                         | Survivors had impaired neurocognitive function, associated with low social attainment and poor quality of life, with respect to age-matched controls                                                                                                                                               |
| Sales et al. (25)          | 2019 | Brazil                  | Observational, prospective                     | Colorectal                   | 85     | Fluoropyrimidine                                                                                     | Assessment at baseline and after 12 mo                                            | After 12 mo, executive function was lower in patients with adjuvant chemotherapy than in those without                                                                                                                                                                                             |
| van der Willik et al. (30) | 2018 | Netherlands             | Cohort                                         | Breast                       | 166    | Cyclophosphamide, methotrexate, and fluorouracil                                                     | Assessment at 20 y after chemotherapy                                             | Survivors had lower cognitive performance and higher levels of inflammatory markers than nonchemotherapy matched controls; significant association existed between cognitive impairment and inflammatory biomarkers                                                                                |
| Phillips et al. (29)       | 2020 | United States           | Cross-sectional                                | Acute lymphoblastic leukemia | 176    | Methotrexate                                                                                         | Evaluation at 2 y after diagnosis                                                 | Brain volume was not discrepant between acute survivors and controls, but cerebellar volume was reduced in survivors; at neuropsychologic assessment, executive function was impaired in female survivors                                                                                          |
| Wagner et al. (31)         | 2020 | United States           | Cohort                                         | Breast                       | 454    | Docetaxel, cyclophosphamide, and anthracycline                                                       | Evaluation of self-reported cognitive impairment at baseline and every 3 mo       | Chemotherapy plus endocrine therapy ( $n = 218$ ) resulted in significant self-reported cognitive impairment compared with endocrine therapy alone                                                                                                                                                 |
| Keetile et al. (28)        | 2021 | South Africa            | Randomized, time-based                         | Breast                       | 30     | Cyclophosphamide, methotrexate, and fluorouracil and fluorouracil, doxorubicin, and cyclophosphamide | Assessment at baseline, 3rd cycle, and 6th cycle (completion of chemotherapy)     | Cognitive decline was significant from baseline to completion of chemotherapy                                                                                                                                                                                                                      |
| Beesley et al. (26)        | 2022 | Australia               | Prospective                                    | Ovarian                      | 726    | At least 3 cycles of platinum                                                                        | Assessment every 3 mo, starting 6 mo after diagnosis up to 4 y                    | Long-term moderate-to-severe fatigue (32%), trouble sleeping (31%), and anxiety (18%) were common                                                                                                                                                                                                  |
| Durán-Gómez et al. (27)    | 2022 | Spain                   | Observational, cross-sectional, nonprobability | Breast                       | 180    | Docetaxel, cyclophosphamide, and anthracycline                                                       | Assessment of newly diagnosed patients under chemotherapy                         | Cognitive impairment, significantly associated with chemotherapy exposure, was perceived in 41.7% of patients; near-infrared spectroscopy showed meaningfully lower oxygen saturation in frontal cortex of chemotherapy group ( $n = 90$ ) than in no-chemotherapy group ( $n = 90$ )              |

R-CHOP = rituximab, cyclophosphamide, hydroxydaunomycin, vincristine sulfate, and prednisone.
